# Supplementary material for: Release of Selected Metals (Al, Cd, Cu, Mn, Ni, Fe, Zn) from River Bottom Sediments: An Experimental Study
Source: MDPI journal article supplement (doi:10.3390/limnolrev23020004), 2023-07-20
Supplement: s1 [file s1]

**Table S1** Research sites—the Nysa Szalona River and its tributaries above the Stup dam reservoir

|    | Site                                                | Geographical Coordinates |                   |
|----|-----------------------------------------------------|--------------------------|-------------------|
| 1  | The Nysa Szalona river below the springs in Domanów | N50° 51' 38.8261"        | E16° 3' 54.4715"  |
| 2  | Kocik                                               | N50° 52' 15.4891"        | E16° 4' 5.9042"   |
| 3  | Ochodnik                                            | N50° 53' 37.1718"        | E16° 5' 59.7672"  |
| 4  | Sadówka                                             | N50° 55' 58.609"         | E16° 10' 11.3627" |
| 5  | Czyściel                                            | N50° 57' 49.4252"        | E16° 13' 57.6982" |
| 6  | Radynia                                             | N50° 58' 56.648"         | E16° 14' 13.9202" |
| 7  | Nysa Mała                                           | N51° 0' 10.455"          | E16° 12' 26.0825" |
| 8  | Puszówka                                            | N51° 2' 30.3945"         | E16° 11' 39.425"  |
| 9  | Jawornik                                            | N51° 2' 57.6884"         | E16° 10' 52.4584" |
| 10 | Księginka                                           | N51° 3' 17.4033"         | E16° 10' 11.2082" |
| 11 | Starucha                                            | N51° 4' 31.7745"         | E16° 9' 17.7528"  |
| 12 | Rowiec                                              | N51° 4' 22.844"          | E16° 8' 27.5419"  |
| 13 | Męcinka                                             | N51° 4' 29.2507"         | E16° 7' 28.5247"  |
| 14 | Nysa Szalona mouth to the Stup reservoir            | N51° 4' 29.2507"         | E16° 7' 28.5247"  |

**Table S2** Research sites—the Strzegomka River and its tributaries above the Dobromierz dam reservoir

|   | Site                                                       | Geographical Coordinates |                   |
|---|------------------------------------------------------------|--------------------------|-------------------|
| 1 | The Strzegomka River below the springs in Nowe Bogaczowice | N50° 50' 14.5978"        | E16° 7' 49.845"   |
| 2 | Polska Woda                                                | N50° 52' 48.0601"        | E16° 11' 56.4194" |
| 3 | Sikorka                                                    | N50° 51' 47.2613"        | E16° 13' 21.3918" |
| 4 | Czyżynka                                                   | N50° 52' 15.8303"        | E16° 14' 29.8332" |
| 5 | Strzegomka mouth to the Dobromierz reservoir               | N50° 53' 11.1994"        | E16° 13' 58.4707" |

**Table S3** Research sites—the Bystrzyca River and its tributaries above the Lubachów dam reservoir

|   | Site                                              | Geographical Coordinates |                   |
|---|---------------------------------------------------|--------------------------|-------------------|
| 1 | The Bystrzyca River below the springs in Wrześnik | N50° 38' 10.1652"        | E16° 24' 5.7915"  |
| 2 | Złoty Potok                                       | N50° 38' 29.3697"        | E16° 24' 41.0163" |
| 3 | Kłobia                                            | N50° 40' 9.374"          | E16° 23' 27.0131" |
| 4 | Otluczyna                                         | N50° 40' 36.2015"        | E16° 22' 46.8444" |
| 5 | Potok Marcowy Duży                                | N50° 41' 5.2762"         | E16° 22' 32.3218" |
| 6 | Złota Woda                                        | N50° 41' 4.2973"         | E16° 22' 11.0015" |
| 7 | Rybna                                             | N50° 41' 49.8085"        | E16° 21' 58.1784" |
| 8 | Jaworzynik                                        | N50° 43' 25.8799"        | E16° 23' 56.5218" |
| 9 | Walimianka                                        | N50° 43' 49.9381"        | E16° 24' 15.0612" |

|    |                                           |                  |                  |
|----|-------------------------------------------|------------------|------------------|
| 10 | Bystrzyca mouth to the Lubachów reservoir | N50° 45' 5.8065" | E16° 25' 1.4097" |
|----|-------------------------------------------|------------------|------------------|

**Table S4** Lithological separation for research rivers

| Main river           | Tributary           | Lithological separation                                                                                                                                                                                                                                                                                                           |
|----------------------|---------------------|-----------------------------------------------------------------------------------------------------------------------------------------------------------------------------------------------------------------------------------------------------------------------------------------------------------------------------------|
| Nysa Szalona springs |                     | greenschist and greenschist shale<br>grey shale<br>gray shales with insets of Tarczyn quartzites                                                                                                                                                                                                                                  |
|                      | Ochodnik            | lower grey siltstone with inserts of greywacke and conglomerate in the bottom of volcanic rocks                                                                                                                                                                                                                                   |
| Strzegomka           |                     | polymictic conglomerates, culm from Stare Bogaczowice (Middle Sudetic Trough)                                                                                                                                                                                                                                                     |
|                      | Polska Woda         | greywacke and undivided siltstone (Świebodzice Depression)<br>peaked shale, Cieszow unit<br>siltstone (Świebodzice Depression)<br>sandstones, conglomerates and clays with streaks of hard coal (Świebodzice Depression)<br>spilites, Cieszow unit                                                                                |
|                      | Sikorka             | greywacke and undivided siltstone (Świebodzice Depression)<br>peaked shale, Cieszow unit<br>siltstone (Świebodzice Depression)<br>sandstones, conglomerates and clays with streaks of hard coal (Świebodzice Depression)<br>spilites, Cieszow unit                                                                                |
|                      |                     | sandstones with conglomerate shoals together with inserts of clay shale and tuffite in the roof (building sandstones)                                                                                                                                                                                                             |
| Bystrzyca springs    | Złoty Potok         | quartzite conglomerates with inserts of lidite conglomerates in the floor<br>sandstones with conglomerate shoals with inserts of clay shales and tuffites in the ceiling (building sandstones)<br>vitroclastic tuffs, rhyolite, volcanic formation of the Stone Mountains                                                         |
|                      | Kłobia and Ołuczyna | arkose conglomerates, strip and clay shales, layers from Ottweiler                                                                                                                                                                                                                                                                |
|                      | Potok Marcowy Duży  | biotite gneisses and migmatitic gneisses<br>migmatites and stratified (streambed) gneisses                                                                                                                                                                                                                                        |
|                      | Złota Woda          | claystones and siltstones with inserts of fine-grained sandstones, locally bituminous, thin-laminated claystones, Zagórzyn sandstone cell, Slupca formation<br>sandstones, subordinate conglomerates and claystones and siltstones, partly tuffogenic with carbonate concretions, Krajanow sandstone cell, formation from Świerki |
|                      |                     |                                                                                                                                                                                                                                                                                                                                   |

|                                          |            |                                                                                                                                                                                                                                                                                                                                                                               |
|------------------------------------------|------------|-------------------------------------------------------------------------------------------------------------------------------------------------------------------------------------------------------------------------------------------------------------------------------------------------------------------------------------------------------------------------------|
| Bystrzyca<br>estuary to the<br>reservoir |            | conglomerates and sandstones, Ludwikowice<br>conglomerate link, formation from Świerki<br>sandstones, siltstones and claystones, subordinate<br>conglomerate inserts - sandstone and siltstone cell<br>from Grzmiąca, Glinik formation<br>migmatites and stratified gneisses (streambed)                                                                                      |
|                                          | Rybna      | sandstones, subordinate conglomerates and<br>claystones and siltstones, partly tuffogenic with<br>carbonate concretions, Krajanow sandstone cell,<br>formation from Świerki<br>lithic tuffs, rhyolites, tuffites and pyroclastic<br>breccias, volcanic formation of the Stone<br>Mountains<br>rhyolites and felsite rhyodacites, volcanic<br>formation of the Stone Mountains |
|                                          | Jaworzynik | gneiss conglomerates and sandstones,<br>sedimentary series of the Sowie Mountains<br>biotite-plagioclase gneisses, fine-bedded, partially<br>migmatized                                                                                                                                                                                                                       |
|                                          | Walimianka | biotite-plagioclase gneisses, fine-bedded, partially<br>migmatized<br>gneiss conglomerates and sandstones,<br>sedimentary series of the Sowie Mountains<br>migmatites and stratified gneisses (streaky)                                                                                                                                                                       |
|                                          |            | biotite gneisses and migmatitic gneisses                                                                                                                                                                                                                                                                                                                                      |

**Table S5** Aluminum release (mg/L) from bottom sediments of the Strzegomka, Nysa Szalona and Bystrzyca rivers under laboratory conditions

| time | Strzegomka                             |                                        |                                        | Nysa Szalona                           |                                        |                                        | Bystrzyca                              |                                        |                                        |
|------|----------------------------------------|----------------------------------------|----------------------------------------|----------------------------------------|----------------------------------------|----------------------------------------|----------------------------------------|----------------------------------------|----------------------------------------|
|      | environment                            |                                        |                                        |                                        |                                        |                                        |                                        |                                        |                                        |
|      | acidic                                 | neutral                                | alkaline                               | acidic                                 | neutral                                | alkaline                               | acidic                                 | neutral                                | alkaline                               |
|      | min-max<br>$\bar{x} \pm SD$            |                                        |                                        |                                        |                                        |                                        |                                        |                                        |                                        |
| 0'   | 0.0012-0.0014<br>0.0012±0.0001         |                                        |                                        |                                        |                                        |                                        |                                        |                                        |                                        |
| 15'  | 0.0766-<br>0.0769<br>0.0768±0<br>.0001 | 0.0345-<br>0.0348<br>0.0346±0<br>.0001 | 0.0293-<br>0.0295<br>0.0294±0<br>.0001 | 0.0811-<br>0.0813<br>0.0812±0<br>.0001 | 0.0714-<br>0.0720<br>0.0718±0<br>.0003 | 0.0215-<br>0.0217<br>0.0216±0<br>.0001 | 0.0681-<br>0.0685<br>0.0683±0<br>.0002 | 0.0375-<br>0.0378<br>0.0377±0<br>.0001 | 0.0361-<br>0.0363<br>0.0362±0<br>.0001 |
| 30'  | 0.0791-<br>0.0794<br>0.0792±0<br>.0001 | 0.0403-<br>0.0407<br>0.0405±0<br>.0002 | 0.0296-<br>0.0299<br>0.0298±0<br>.0001 | 0.0891-<br>0.0893<br>0.0892±0<br>.0001 | 0.0725-<br>0.0728<br>0.0726±0<br>.0001 | 0.0216-<br>0.0218<br>0.0217±0<br>.0001 | 0.0691-<br>0.0696<br>0.0694±0<br>.0002 | 0.0443-<br>0.0446<br>0.0445±0<br>.0001 | 0.0226-<br>0.0228<br>0.0227±0<br>.0001 |
| 3h   | 0.0772-<br>0.0775<br>0.0774±0<br>.0001 | 0.0435-<br>0.0438<br>0.0437±0<br>.0001 | 0.0300-<br>0.0305<br>0.0302±0<br>.0002 | 0.0832-<br>0.0834<br>0.0833±0<br>.0001 | 0.0835-<br>0.0837<br>0.0836±0<br>.0001 | 0.0304-<br>0.0306<br>0.0305±0<br>.0001 | 0.0641-<br>0.0644<br>0.0643±0<br>.0001 | 0.0655-<br>0.0658<br>0.0657±0<br>.0001 | 0.0138-<br>0.0140<br>0.0139±0<br>.0001 |

|    |          |          |          |          |          |          |          |          |          |
|----|----------|----------|----------|----------|----------|----------|----------|----------|----------|
| 12 | 0.0435-  | 0.0319-  | 0.0305-  | 0.0762-  | 0.0817-  | 0.0213-  | 0.0415-  | 0.0602-  | 0.0322-  |
| h  | 0.0436   | 0.0321   | 0.0309   | 0.0765   | 0.0820   | 0.0215   | 0.0419   | 0.0604   | 0.0325   |
|    | 0.0435±0 | 0.0320±0 | 0.0307±0 | 0.0764±0 | 0.0818±0 | 0.0214±0 | 0.0417±0 | 0.0603±0 | 0.0323±0 |
|    | .0001    | .0001    | .0002    | .0001    | .0001    | .0001    | .0002    | .0001    | .0001    |
| 24 | 0.0411-  | 0.0281-  | 0.0315-  | 0.0593-  | 0.0685-  | 0.0206-  | 0.0431-  | 0.0584-  | 0.0395-  |
| h  | 0.0413   | 0.0290   | 0.0319   | 0.0597   | 0.0688   | 0.0209   | 0.0435   | 0.0588   | 0.0398   |
|    | 0.0412±0 | 0.0287±0 | 0.0317±0 | 0.0595±0 | 0.0687±0 | 0.0208±0 | 0.0433±0 | 0.0586±0 | 0.0397±0 |
|    | .0001    | .0004    | .0002    | .0002    | .0001    | .0001    | .0002    | .0002    | .0001    |
| 48 | 0.0381-  | 0.0231-  | 0.0303-  | 0.0587-  | 0.0583-  | 0.0180-  | 0.0345-  | 0.0404-  | 0.0403-  |
| h  | 0.0384   | 0.0233   | 0.0305   | 0.0590   | 0.0586   | 0.0182   | 0.0348   | 0.0407   | 0.0409   |
|    | 0.0382±0 | 0.0232±0 | 0.0304±0 | 0.0589±0 | 0.0585±0 | 0.0181±0 | 0.0347±0 | 0.0406±0 | 0.0407±0 |
|    | .0001    | .0001    | .0001    | .0001    | .0001    | .0001    | .0001    | .0001    | .0003    |
| 96 | 0.0437-  | 0.0296-  | 0.0295-  | 0.0591-  | 0.0664-  | 0.0095-  | 0.0593-  | 0.0481-  | 0.0431-  |
| h  | 0.0440   | 0.0299   | 0.0298   | 0.0596   | 0.0668   | 0.0098   | 0.0596   | 0.0483   | 0.0433   |
|    | 0.0439±0 | 0.0298±0 | 0.0296±0 | 0.0594±0 | 0.0666±0 | 0.0097±0 | 0.0595±0 | 0.0482±0 | 0.0432±0 |
|    | .0001    | .0001    | .0001    | .0002    | .0002    | .0001    | .0001    | .0001    | .0001    |

**Table S6** Copper release (mg/L) from bottom sediments of the Strzegomka, Nysa Szalona and Bystrzyca rivers under laboratory conditions

| time | Strzegomka                     |                                |                                | Nysa Szalona                   |                                |                                | Bystrzyca                      |                                |                                |
|------|--------------------------------|--------------------------------|--------------------------------|--------------------------------|--------------------------------|--------------------------------|--------------------------------|--------------------------------|--------------------------------|
|      | environment                    |                                |                                |                                |                                |                                |                                |                                |                                |
|      | acidic                         | neutral                        | alkaline                       | acidic                         | neutral                        | alkaline                       | acidic                         | neutral                        | alkaline                       |
|      | min-max                        |                                |                                |                                |                                |                                |                                |                                |                                |
|      | $\bar{x}\pm SD$                |                                |                                |                                |                                |                                |                                |                                |                                |
| 0'   | 0.0001-0.0003<br>0.0002±0.0001 |                                |                                |                                |                                |                                |                                |                                |                                |
| 15'  | 0.0092-0.0094<br>0.0093±0.0001 | 0.0063-0.0066<br>0.0065±0.0001 | 0.0060-0.0062<br>0.0061±0.0001 | 0.0106-0.0108<br>0.0107±0.0001 | 0.0053-0.0055<br>0.0054±0.0001 | 0.0084-0.0086<br>0.0085±0.0001 | 0.0111-0.0113<br>0.0112±0.0001 | 0.0061-0.0063<br>0.0062±0.0001 | 0.0092-0.0095<br>0.0093±0.0001 |
| 30'  | 0.0102-0.0104<br>0.0103±0.0001 | 0.0066-0.0069<br>0.0068±0.0001 | 0.0073-0.0075<br>0.0074±0.0001 | 0.0107-0.0109<br>0.0108±0.0001 | 0.0066-0.0068<br>0.0067±0.0001 | 0.0094-0.0096<br>0.0095±0.0001 | 0.0106-0.0108<br>0.0107±0.0001 | 0.0070-0.0074<br>0.0072±0.0002 | 0.0090-0.0092<br>0.0091±0.0001 |
| 3h   | 0.0092-0.0094<br>0.0093±0.0001 | 0.0070-0.0072<br>0.0071±0.0001 | 0.0086-0.0088<br>0.0087±0.0001 | 0.0090-0.0092<br>0.0091±0.0001 | 0.0071-0.0073<br>0.0072±0.0001 | 0.0090-0.0093<br>0.0091±0.0001 | 0.0095-0.0097<br>0.0096±0.0001 | 0.0074-0.0077<br>0.0075±0.0001 | 0.0083-0.0085<br>0.0084±0.0001 |
| 12h  | 0.0087-0.0089<br>0.0088±0.0001 | 0.0075-0.0078<br>0.0076±0.0001 | 0.0122-0.0124<br>0.0123±0.0001 | 0.0058-0.0060<br>0.0059±0.0001 | 0.0076-0.0078<br>0.0077±0.0001 | 0.0124-0.0126<br>0.0125±0.0001 | 0.0061-0.0063<br>0.0062±0.0001 | 0.0104-0.0107<br>0.0106±0.0001 | 0.0134-0.0136<br>0.0135±0.0001 |
| 24h  | 0.0078-0.0081<br>0.0079±0.0001 | 0.0078-0.0080<br>0.0079±0.0001 | 0.0124-0.0126<br>0.0125±0.0001 | 0.0063-0.0066<br>0.0065±0.0001 | 0.0078-0.0080<br>0.0079±0.0001 | 0.0104-0.0106<br>0.0105±0.0001 | 0.0070-0.0073<br>0.0071±0.0001 | 0.0089-0.0092<br>0.0091±0.0001 | 0.0137-0.0139<br>0.0138±0.0001 |
| 48h  | 0.0074-0.0076                  | 0.0080-0.0082                  | 0.0125-0.0127                  | 0.0051-0.0055                  | 0.0073-0.0075                  | 0.0114-0.0116                  | 0.0064-0.0066                  | 0.0082-0.0088                  | 0.0111-0.0116                  |

|    |                   |                   |                   |                   |                   |                   |                   |                   |                   |
|----|-------------------|-------------------|-------------------|-------------------|-------------------|-------------------|-------------------|-------------------|-------------------|
|    | 0.0075±0<br>.0001 | 0.0081±0<br>.0001 | 0.0126±0<br>.0001 | 0.0053±0<br>.0002 | 0.0074±0<br>.0001 | 0.0115±0<br>.0001 | 0.0065±0<br>.0001 | 0.0086±0<br>.0003 | 0.0114±0<br>.0002 |
| 96 | 0.0070-<br>0.0072 | 0.0095-<br>0.0098 | 0.0125-<br>0.0127 | 0.0046-<br>0.0049 | 0.0090-<br>0.0092 | 0.0101-<br>0.0103 | 0.0056-<br>0.0059 | 0.0082-<br>0.0089 | 0.0108-<br>0.0111 |
| h  | 0.0071±0<br>.0001 | 0.0097±0<br>.0001 | 0.0126±0<br>.0001 | 0.0048±0<br>.0001 | 0.0091±0<br>.0001 | 0.0102±0<br>.0001 | 0.0058±0<br>.0001 | 0.0086±0<br>.0003 | 0.0109±0<br>.0001 |

**Table S7** Manganese release (mg/L) from bottom sediments of the Strzegomka, Nysa Szalona and Bystrzyca rivers under laboratory conditions

| time | Strzegomka                     |                                |                                | Nysa Szalona                   |                                |                                | Bystrzyca                      |                                |                                |
|------|--------------------------------|--------------------------------|--------------------------------|--------------------------------|--------------------------------|--------------------------------|--------------------------------|--------------------------------|--------------------------------|
|      | environment                    |                                |                                |                                |                                |                                |                                |                                |                                |
|      | acidic                         | neutral                        | alkaline                       | acidic                         | neutral                        | alkaline                       | acidic                         | neutral                        | alkaline                       |
|      | min-max                        |                                |                                |                                |                                |                                |                                |                                |                                |
|      | $\bar{x}\pm SD$                |                                |                                |                                |                                |                                |                                |                                |                                |
| 0'   | 0.0007-0.0009<br>0.0008±0.0001 |                                |                                |                                |                                |                                |                                |                                |                                |
| 15'  | 0.0953-0.0956<br>0.0955±0.0001 | 0.0165-0.0168<br>0.0167±0.0001 | 0.0040-0.0042<br>0.0041±0.0001 | 0.1321-0.1324<br>0.1322±0.0001 | 0.0103-0.0107<br>0.0105±0.0002 | 0.0092-0.0095<br>0.0094±0.0001 | 0.1135-0.1138<br>0.1137±0.0001 | 0.0332-0.0336<br>0.0334±0.0002 | 0.0108-0.0111<br>0.0109±0.0001 |
| 30'  | 0.0620-0.0623<br>0.0621±0.0001 | 0.0191-0.0193<br>0.0192±0.0001 | 0.0042-0.0044<br>0.0043±0.0001 | 0.1172-0.1176<br>0.1174±0.0002 | 0.0106-0.0109<br>0.0108±0.0001 | 0.0091-0.0094<br>0.0093±0.0001 | 0.0752-0.0754<br>0.0753±0.0001 | 0.0305-0.0307<br>0.0306±0.0001 | 0.0092-0.0096<br>0.0094±0.0002 |
| 3h   | 0.1367-0.1369<br>0.1368±0.0001 | 0.0193-0.0195<br>0.0194±0.0001 | 0.0091-0.0093<br>0.0092±0.0001 | 0.1223-0.1225<br>0.1224±0.0001 | 0.0123-0.0126<br>0.0124±0.0001 | 0.0114-0.0118<br>0.0116±0.0002 | 0.1112-0.1115<br>0.1114±0.0001 | 0.0325-0.0327<br>0.0326±0.0001 | 0.0104-0.0106<br>0.0105±0.0001 |
| 12h  | 0.1914-0.1916<br>0.1915±0.0001 | 0.0251-0.0254<br>0.0252±0.0001 | 0.0094-0.0096<br>0.0095±0.0001 | 0.2564-0.2569<br>0.2567±0.0002 | 0.0305-0.0308<br>0.0307±0.0001 | 0.0083-0.0086<br>0.0085±0.0001 | 0.2963-0.2967<br>0.2965±0.0002 | 0.0715-0.0719<br>0.0717±0.0002 | 0.0092-0.0094<br>0.0093±0.0001 |
| 24h  | 0.2133-0.2135<br>0.2134±0.0001 | 0.0366-0.0368<br>0.0367±0.0001 | 0.0093-0.0097<br>0.0095±0.0002 | 0.3315-0.3318<br>0.3317±0.0001 | 0.0264-0.0267<br>0.0266±0.0001 | 0.0087-0.0089<br>0.0088±0.0001 | 0.3330-0.3334<br>0.3332±0.0002 | 0.0688-0.0691<br>0.0689±0.0001 | 0.0155-0.0157<br>0.0156±0.0001 |
| 48h  | 0.2356-0.2358<br>0.2357±0.0001 | 0.0682-0.0685<br>0.0684±0.0001 | 0.0095-0.0098<br>0.0097±0.0001 | 0.2812-0.2814<br>0.2813±0.0001 | 0.0250-0.0252<br>0.0251±0.0001 | 0.0101-0.0106<br>0.0104±0.0002 | 0.4414-0.4419<br>0.4417±0.0002 | 0.0622-0.0629<br>0.0626±0.0003 | 0.0151-0.0155<br>0.0153±0.0002 |
| 96h  | 0.4844-0.4846<br>0.4845±0.0001 | 0.0675-0.0677<br>0.0676±0.0001 | 0.0112-0.0115<br>0.0114±0.0001 | 0.5414-0.5419<br>0.5417±0.0002 | 0.0236-0.0238<br>0.0237±0.0001 | 0.0120-0.0122<br>0.0121±0.0001 | 0.4212-0.4216<br>0.4214±0.0002 | 0.1100-0.1109<br>0.1106±0.0004 | 0.0193-0.0197<br>0.0195±0.0002 |

**Table S8** Iron release (mg/L) from bottom sediments of the Strzegomka, Nysa Szalona and Bystrzyca rivers under laboratory conditions

| Strzegomka | Nysa Szalona | Bystrzyca |
|------------|--------------|-----------|
|------------|--------------|-----------|

| ti<br>m<br>e | environment                            |                                        |                                        |                                        |                                        |                                        |                                        |                                        |                                        |
|--------------|----------------------------------------|----------------------------------------|----------------------------------------|----------------------------------------|----------------------------------------|----------------------------------------|----------------------------------------|----------------------------------------|----------------------------------------|
|              | acidic                                 | neutral                                | alkaline                               | acidic                                 | neutral                                | alkaline                               | acidic                                 | neutral                                | alkaline                               |
|              | min-max                                |                                        |                                        |                                        |                                        |                                        |                                        |                                        |                                        |
|              | $\bar{x}\pm SD$                        |                                        |                                        |                                        |                                        |                                        |                                        |                                        |                                        |
| 0'           | 0.0132-0.0134<br>0.0133±0.0001         |                                        |                                        |                                        |                                        |                                        |                                        |                                        |                                        |
| 15'          | 0.0360-<br>0.0363<br>0.0361±0<br>.0001 | 0.0415-<br>0.0419<br>0.0417±0<br>.0002 | 0.0274-<br>0.0277<br>0.0276±0<br>.0001 | 0.0565-<br>0.0568<br>0.0567±0<br>.0001 | 0.0462-<br>0.0464<br>0.0463±0<br>.0001 | 0.0532-<br>0.0536<br>0.0534±0<br>.0002 | 0.0323-<br>0.0328<br>0.0326±0<br>.0002 | 0.0325-<br>0.0328<br>0.0327±0<br>.0001 | 0.0364-<br>0.0366<br>0.0365±0<br>.0001 |
| 30'          | 0.0464-<br>0.0466<br>0.0465±0<br>.0001 | 0.0400-<br>0.0403<br>0.0402±0<br>.0001 | 0.0303-<br>0.0306<br>0.0304±0<br>.0001 | 0.0861-<br>0.0865<br>0.0863±0<br>.0002 | 0.0452-<br>0.0456<br>0.0454±0<br>.0002 | 0.0454-<br>0.0459<br>0.0457±0<br>.0002 | 0.0302-<br>0.0305<br>0.0304±0<br>.0001 | 0.0358-<br>0.0360<br>0.0359±0<br>.0001 | 0.0361-<br>0.0363<br>0.0362±0<br>.0001 |
| 3<br>h       | 0.0412-<br>0.0415<br>0.0413±0<br>.0001 | 0.0410-<br>0.0413<br>0.0411±0<br>.0001 | 0.0475-<br>0.0477<br>0.0476±0<br>.0001 | 0.0462-<br>0.0466<br>0.0464±0<br>.0002 | 0.0774-<br>0.0779<br>0.0777±0<br>.0002 | 0.0660-<br>0.0663<br>0.0661±0<br>.0001 | 0.0309-<br>0.0312<br>0.0311±0<br>.0001 | 0.0335-<br>0.0338<br>0.0337±0<br>.0001 | 0.0366-<br>0.0369<br>0.0368±0<br>.0001 |
| 12<br>h      | 0.0207-<br>0.0211<br>0.0209±0<br>.0002 | 0.0261-<br>0.0264<br>0.0263±0<br>.0001 | 0.0291-<br>0.0294<br>0.0292±0<br>.0001 | 0.0201-<br>0.0203<br>0.0202±0<br>.0001 | 0.0565-<br>0.0568<br>0.0567±0<br>.0001 | 0.0492-<br>0.0494<br>0.0493±0<br>.0001 | 0.0277-<br>0.0279<br>0.0278±0<br>.0001 | 0.0389-<br>0.0392<br>0.0391±0<br>.0001 | 0.0280-<br>0.0288<br>0.0285±0<br>.0004 |
| 24<br>h      | 0.0173-<br>0.0175<br>0.0174±0<br>.0001 | 0.0250-<br>0.0253<br>0.0251±0<br>.0001 | 0.0501-<br>0.0504<br>0.0503±0<br>.0001 | 0.0350-<br>0.0352<br>0.0351±0<br>.0001 | 0.0356-<br>0.0358<br>0.0357±0<br>.0001 | 0.0522-<br>0.0525<br>0.0524±0<br>.0001 | 0.0260-<br>0.0263<br>0.0262±0<br>.0001 | 0.0257-<br>0.0259<br>0.0258±0<br>.0001 | 0.0291-<br>0.0295<br>0.0293±0<br>.0002 |
| 48<br>h      | 0.0213-<br>0.0216<br>0.0214±0<br>.0001 | 0.0151-<br>0.0153<br>0.0152±0<br>.0001 | 0.0277-<br>0.0279<br>0.0278±0<br>.0001 | 0.0146-<br>0.0148<br>0.0147±0<br>.0001 | 0.0276-<br>0.0278<br>0.0277±0<br>.0001 | 0.0441-<br>0.0443<br>0.0442±0<br>.0001 | 0.0175-<br>0.0177<br>0.0176±0<br>.0001 | 0.0218-<br>0.0221<br>0.0219±0<br>.0001 | 0.0242-<br>0.0244<br>0.0243±0<br>.0001 |
| 96<br>h      | 0.0182-<br>0.0188<br>0.0186±0<br>.0003 | 0.0421-<br>0.0423<br>0.0422±0<br>.0001 | 0.0226-<br>0.0229<br>0.0228±0<br>.0001 | 0.0247-<br>0.0249<br>0.0248±0<br>.0001 | 0.0281-<br>0.0283<br>0.0282±0<br>.0001 | 0.0223-<br>0.0230<br>0.0227±0<br>.0003 | 0.0233-<br>0.0237<br>0.0235±0<br>.0002 | 0.0148-<br>0.0151<br>0.0149±0<br>.0001 | 0.0191-<br>0.0196<br>0.0194±0<br>.0002 |

**Table S9** Nickel release (mg/L) from bottom sediments of the Strzegomka, Nysa Szalona and Bystrzyca rivers under laboratory conditions

| time | Strzegomka                             |                                        |                                        | Nysa Szalona                           |                                        |                                        | Bystrzyca                              |                                        |                                        |
|------|----------------------------------------|----------------------------------------|----------------------------------------|----------------------------------------|----------------------------------------|----------------------------------------|----------------------------------------|----------------------------------------|----------------------------------------|
|      | environment                            |                                        |                                        |                                        |                                        |                                        |                                        |                                        |                                        |
|      | acidic                                 | neutral                                | alkaline                               | acidic                                 | neutral                                | alkaline                               | acidic                                 | neutral                                | alkaline                               |
|      | min-max<br>$\bar{x}\pm SD$             |                                        |                                        |                                        |                                        |                                        |                                        |                                        |                                        |
| 0'   | 0.0001-0.0002<br>0.0001±0.0000         |                                        |                                        |                                        |                                        |                                        |                                        |                                        |                                        |
| 15'  | 0.0152-<br>0.0156<br>0.0154±0<br>.0002 | 0.0001-<br>0.0003<br>0.0002±0<br>.0001 | 0.0001-<br>0.0002<br>0.0001±0<br>.0000 | 0.0063-<br>0.0065<br>0.0064±0<br>.0001 | 0.0001-<br>0.0002<br>0.0001±0<br>.0000 | 0.0131-<br>0.0134<br>0.0132±0<br>.0001 | 0.0059-<br>0.0061<br>0.0060±0<br>.0001 | 0.0013-<br>0.0015<br>0.0014±0<br>.0001 | 0.0135-<br>0.0138<br>0.0137±0<br>.0001 |
| 30'  | 0.0147-<br>0.0149                      | 0.0014-<br>0.0016                      | 0.0031-<br>0.0033                      | 0.0024-<br>0.0026                      | 0.0001-<br>0.0002                      | 0.0146-<br>0.0149                      | 0.0054-<br>0.0058                      | 0.0011-<br>0.0014                      | 0.0126-<br>0.0128                      |

|      |                   |                   |                   |                   |                   |                   |                   |                   |                   |
|------|-------------------|-------------------|-------------------|-------------------|-------------------|-------------------|-------------------|-------------------|-------------------|
|      | 0.0148±0<br>.0001 | 0.0015±0<br>.0001 | 0.0032±0<br>.0001 | 0.0025±0<br>.0001 | 0.0001±0<br>.0000 | 0.0147±0<br>.0001 | 0.0056±0<br>.0002 | 0.0012±0<br>.0001 | 0.0127±0<br>.0001 |
| 3 h  | 0.0131-<br>0.0133 | 0.0001-<br>0.0003 | 0.0148-<br>0.0150 | 0.0074-<br>0.0076 | 0.0012-<br>0.0015 | 0.0145-<br>0.0147 | 0.0025-<br>0.0027 | 0.0002-<br>0.0004 | 0.0110-<br>0.0114 |
|      | 0.0132±0<br>.0001 | 0.0002±0<br>.0001 | 0.0149±0<br>.0001 | 0.0075±0<br>.0001 | 0.0013±0<br>.0001 | 0.0146±0<br>.0001 | 0.0026±0<br>.0001 | 0.0003±0<br>.0001 | 0.0112±0<br>.0002 |
| 12 h | 0.0082-<br>0.0084 | 0.0020-<br>0.0023 | 0.0126-<br>0.0128 | 0.0062-<br>0.0064 | 0.0001-<br>0.0002 | 0.0141-<br>0.0144 | 0.0048-<br>0.0050 | 0.0001-<br>0.0002 | 0.0102-<br>0.0105 |
|      | 0.0083±0<br>.0001 | 0.0021±0<br>.0001 | 0.0127±0<br>.0001 | 0.0063±0<br>.0001 | 0.0001±0<br>.0000 | 0.0142±0<br>.0001 | 0.0049±0<br>.0001 | 0.0001±0<br>.0000 | 0.0104±0<br>.0001 |
| 24 h | 0.0031-<br>0.0033 | 0.0030-<br>0.0032 | 0.0132-<br>0.0135 | 0.0058-<br>0.0060 | 0.0001-<br>0.0002 | 0.0121-<br>0.0123 | 0.0131-<br>0.0133 | 0.0001-<br>0.0002 | 0.0133-<br>0.0135 |
|      | 0.0032±0<br>.0001 | 0.0031±0<br>.0001 | 0.0134±0<br>.0001 | 0.0059±0<br>.0001 | 0.0001±0<br>.0000 | 0.0122±0<br>.0001 | 0.0132±0<br>.0001 | 0.0001±0<br>.0000 | 0.0134±0<br>.0001 |
| 48 h | 0.0057-<br>0.0059 | 0.0046-<br>0.0048 | 0.0121-<br>0.0123 | 0.0032-<br>0.0035 | 0.0001-<br>0.0002 | 0.0130-<br>0.0132 | 0.0065-<br>0.0068 | 0.0028-<br>0.0030 | 0.0136-<br>0.0138 |
|      | 0.0058±0<br>.0001 | 0.0047±0<br>.0001 | 0.0122±0<br>.0001 | 0.0033±0<br>.0001 | 0.0001±0<br>.0000 | 0.0131±0<br>.0001 | 0.0067±0<br>.0001 | 0.0029±0<br>.0001 | 0.0137±0<br>.0001 |
| 96 h | 0.0090-<br>0.0100 | 0.0011-<br>0.0013 | 0.0140-<br>0.0151 | 0.0078-<br>0.0080 | 0.0006-<br>0.0008 | 0.0106-<br>0.0108 | 0.0081-<br>0.0084 | 0.0001-<br>0.0002 | 0.0128-<br>0.0130 |
|      | 0.0095±0<br>.0004 | 0.0012±0<br>.0001 | 0.0146±0<br>.0005 | 0.0079±0<br>.0001 | 0.0007±0<br>.0001 | 0.0107±0<br>.0001 | 0.0082±0<br>.0001 | 0.0001±0<br>.0000 | 0.0129±0<br>.0001 |

**Table S10** Cadmium release (mg/L) from bottom sediments of the Strzegomka, Nysa Szalona and Bystrzyca rivers under laboratory conditions

| time                        | Strzegomka                     |         |          | Nysa Szalona |         |          | Bystrzyca |         |          |
|-----------------------------|--------------------------------|---------|----------|--------------|---------|----------|-----------|---------|----------|
|                             | environment                    |         |          |              |         |          |           |         |          |
|                             | acidic                         | neutral | alkaline | acidic       | neutral | alkaline | acidic    | neutral | alkaline |
|                             | e                              |         |          | e            |         |          | e         |         |          |
| min-max<br>$\bar{x} \pm SD$ |                                |         |          |              |         |          |           |         |          |
| 0'                          | 0.0001-0.0002<br>0.0001±0.0000 |         |          |              |         |          |           |         |          |
| 15'                         | 0.0031-                        | 0.0006- | 0.0001-  | 0.0006-      | 0.0001- | 0.0034-  | 0.0005-   | 0.0010- | 0.0042-  |
|                             | 0.0033                         | 0.0008  | 0.0003   | 0.0008       | 0.0002  | 0.0037   | 0.0007    | 0.0012  | 0.0044   |
|                             | 0.0032±                        | 0.0007± | 0.0002±  | 0.0007±      | 0.0001± | 0.0036±  | 0.0006±   | 0.0011± | 0.0043±  |
|                             | 0.0001                         | 0.0001  | 0.0001   | 0.0001       | 0.0000  | 0.0001   | 0.0001    | 0.0001  | 0.0001   |
| 30'                         | 0.0017-                        | 0.0004- | 0.0016-  | 0.0015-      | 0.0001- | 0.0034-  | 0.0011-   | 0.0005- | 0.0044-  |
|                             | 0.0019                         | 0.0006  | 0.0018   | 0.0017       | 0.0002  | 0.0036   | 0.0013    | 0.0007  | 0.0046   |
|                             | 0.0018±                        | 0.0005± | 0.0017±  | 0.0016±      | 0.0001± | 0.0035±  | 0.0012±   | 0.0006± | 0.0045±  |
|                             | 0.0001                         | 0.0001  | 0.0001   | 0.0001       | 0.0000  | 0.0001   | 0.0001    | 0.0001  | 0.0001   |
| 3h                          | 0.0015-                        | 0.0010- | 0.0044-  | 0.0011-      | 0.0001- | 0.0032-  | 0.0011-   | 0.0009- | 0.0042-  |
|                             | 0.0017                         | 0.0012  | 0.0046   | 0.0014       | 0.0002  | 0.0035   | 0.0014    | 0.0011  | 0.0045   |
|                             | 0.0016±                        | 0.0011± | 0.0045±  | 0.0012±      | 0.0001± | 0.0033±  | 0.0013±   | 0.0010± | 0.0044±  |
|                             | 0.0001                         | 0.0001  | 0.0001   | 0.0001       | 0.0000  | 0.0001   | 0.0001    | 0.0001  | 0.0001   |
| 12h                         | 0.0017-                        | 0.0014- | 0.0038-  | 0.0001-      | 0.0001- | 0.0033-  | 0.0010-   | 0.0003- | 0.0035-  |
|                             | 0.0019                         | 0.0016  | 0.0041   | 0.0002       | 0.0002  | 0.0035   | 0.0012    | 0.0005  | 0.0039   |
|                             | 0.0018±                        | 0.0015± | 0.0039±  | 0.0001±      | 0.0001± | 0.0034±  | 0.0011±   | 0.0004± | 0.0037±  |
|                             | 0.0001                         | 0.0001  | 0.0001   | 0.0000       | 0.0000  | 0.0001   | 0.0001    | 0.0001  | 0.0002   |

|         |         |         |         |         |         |         |         |         |         |
|---------|---------|---------|---------|---------|---------|---------|---------|---------|---------|
| 24<br>h | 0.0014- | 0.0011- | 0.0041- | 0.0001- | 0.0005- | 0.0024- | 0.0014- | 0.0004- | 0.0036- |
|         | 0.0017  | 0.0014  | 0.0044  | 0.0002  | 0.0008  | 0.0026  | 0.0016  | 0.0006  | 0.0038  |
|         | 0.0015± | 0.0013± | 0.0042± | 0.0001± | 0.0007± | 0.0025± | 0.0015± | 0.0005± | 0.0037± |
|         | 0.0001  | 0.0001  | 0.0001  | 0.0000  | 0.0001  | 0.0001  | 0.0001  | 0.0001  | 0.0001  |
| 48<br>h | 0.0026- | 0.0018- | 0.0042- | 0.0001- | 0.0007- | 0.0026- | 0.0011- | 0.0007- | 0.0030- |
|         | 0.0028  | 0.0020  | 0.0045  | 0.0002  | 0.0009  | 0.0028  | 0.0013  | 0.0009  | 0.0032  |
|         | 0.0027± | 0.0019± | 0.0043± | 0.0001± | 0.0008± | 0.0027± | 0.0012± | 0.0008± | 0.0031± |
|         | 0.0001  | 0.0001  | 0.0001  | 0.0000  | 0.0001  | 0.0001  | 0.0001  | 0.0001  | 0.0001  |
| 96<br>h | 0.0014- | 0.0016- | 0.0040- | 0.0007- | 0.0005- | 0.0029- | 0.0014- | 0.0002- | 0.0026- |
|         | 0.0016  | 0.0018  | 0.0042  | 0.0009  | 0.0007  | 0.0031  | 0.0016  | 0.0004  | 0.0028  |
|         | 0.0015± | 0.0017± | 0.0041± | 0.0008± | 0.0006± | 0.0030± | 0.0015± | 0.0003± | 0.0027± |
|         | 0.0001  | 0.0001  | 0.0001  | 0.0001  | 0.0001  | 0.0001  | 0.0001  | 0.0001  | 0.0001  |

**Table S11** Zinc release (mg/L) from bottom sediments of the Strzegomka, Nysa Szalona and Bystrzyca rivers under laboratory conditions

| time | Strzegomka                     |          |          | Nysa Szalona |          |          | Bystrzyca |          |          |
|------|--------------------------------|----------|----------|--------------|----------|----------|-----------|----------|----------|
|      | environment                    |          |          |              |          |          |           |          |          |
|      | acidic                         | neutral  | alkaline | acidic       | neutral  | alkaline | acidic    | neutral  | alkaline |
|      | min-max<br>$\bar{x}\pm SD$     |          |          |              |          |          |           |          |          |
| 0'   | 0.0322-0.0323<br>0.0322±0.0000 |          |          |              |          |          |           |          |          |
| 15'  | 0.1087-                        | 0.0423-  | 0.0124-  | 0.1108-      | 0.0359-  | 0.0252-  | 0.1183-   | 0.0451-  | 0.0203-  |
|      | 0.1089                         | 0.0425   | 0.0127   | 0.1111       | 0.0362   | 0.0255   | 0.1189    | 0.0454   | 0.0208   |
|      | 0.1088±0                       | 0.0424±0 | 0.0126±0 | 0.1109±0     | 0.0361±0 | 0.0253±0 | 0.1187±0  | 0.0453±0 | 0.0206±0 |
|      | .0001                          | .0001    | .0001    | .0001        | .0001    | .0001    | .0003     | .0001    | .0002    |
| 30'  | 0.1121-                        | 0.0459-  | 0.0210-  | 0.1050-      | 0.0322-  | 0.0185-  | 0.1153-   | 0.0470-  | 0.0156-  |
|      | 0.1123                         | 0.0462   | 0.0212   | 0.1052       | 0.0325   | 0.0187   | 0.1156    | 0.0473   | 0.0158   |
|      | 0.1122±0                       | 0.0461±0 | 0.0211±0 | 0.1051±0     | 0.0324±0 | 0.0186±0 | 0.1155±0  | 0.0472±0 | 0.0157±0 |
|      | .0001                          | .0001    | .0001    | .0001        | .0001    | .0001    | .0001     | .0001    | .0001    |
| 3 h  | 0.1181-                        | 0.0455-  | 0.0169-  | 0.0965-      | 0.0418-  | 0.0152-  | 0.1138-   | 0.0403-  | 0.0130-  |
|      | 0.1183                         | 0.0458   | 0.0172   | 0.0968       | 0.0421   | 0.0155   | 0.1141    | 0.0409   | 0.0135   |
|      | 0.1182±0                       | 0.0457±0 | 0.0171±0 | 0.0967±0     | 0.0419±0 | 0.0154±0 | 0.1139±0  | 0.0407±0 | 0.0133±0 |
|      | .0001                          | .0001    | .0001    | .0001        | .0001    | .0001    | .0001     | .0003    | .0002    |
| 12 h | 0.0925-                        | 0.0231-  | 0.0261-  | 0.0713-      | 0.0241-  | 0.0169-  | 0.1075-   | 0.0421-  | 0.0177-  |
|      | 0.0928                         | 0.0234   | 0.0264   | 0.0716       | 0.0245   | 0.0172   | 0.1078    | 0.0423   | 0.0179   |
|      | 0.0927±0                       | 0.0233±0 | 0.0263±0 | 0.0715±0     | 0.0243±0 | 0.0171±0 | 0.1076±0  | 0.0422±0 | 0.0178±0 |
|      | .0001                          | .0001    | .0001    | .0001        | .0002    | .0001    | .0001     | .0001    | .0001    |
| 24 h | 0.0671-                        | 0.0277-  | 0.0321-  | 0.0466-      | 0.0310-  | 0.0135-  | 0.0915-   | 0.0313-  | 0.0174-  |
|      | 0.0673                         | 0.0279   | 0.0324   | 0.0469       | 0.0312   | 0.0138   | 0.0919    | 0.0318   | 0.0176   |
|      | 0.0672±0                       | 0.0278±0 | 0.0323±0 | 0.0468±0     | 0.0311±0 | 0.0137±0 | 0.0917±0  | 0.0316±0 | 0.0175±0 |
|      | .0001                          | .0001    | .0001    | .0001        | .0001    | .0001    | .0002     | .0002    | .0001    |
| 48 h | 0.0288-                        | 0.0202-  | 0.0155-  | 0.0331-      | 0.0249-  | 0.0106-  | 0.0838-   | 0.0289-  | 0.0141-  |
|      | 0.0290                         | 0.0204   | 0.0158   | 0.0333       | 0.0252   | 0.0109   | 0.0843    | 0.0292   | 0.0144   |
|      | 0.0289±0                       | 0.0203±0 | 0.0156±0 | 0.0332±0     | 0.0251±0 | 0.0108±0 | 0.0841±0  | 0.0291±0 | 0.0143±0 |
|      | .0001                          | .0001    | .0001    | .0001        | .0001    | .0001    | .0002     | .0001    | .0001    |
| 96 h | 0.0533-                        | 0.0251-  | 0.0145-  | 0.313-       | 0.0183-  | 0.0111-  | 0.0849-   | 0.0156-  | 0.0113-  |
|      | 0.0535                         | 0.0254   | 0.0147   | 0.0315       | 0.0186   | 0.0113   | 0.0852    | 0.0158   | 0.0116   |



|          |          |          |          |          |          |          |          |          |
|----------|----------|----------|----------|----------|----------|----------|----------|----------|
| 0.0534±0 | 0.0252±0 | 0.0146±0 | 0.0314±0 | 0.0185±0 | 0.0112±0 | 0.0851±0 | 0.0157±0 | 0.0115±0 |
| .0001    | .0001    | .0001    | .0001    | .0001    | .0001    | .0001    | .0001    | .0001    |

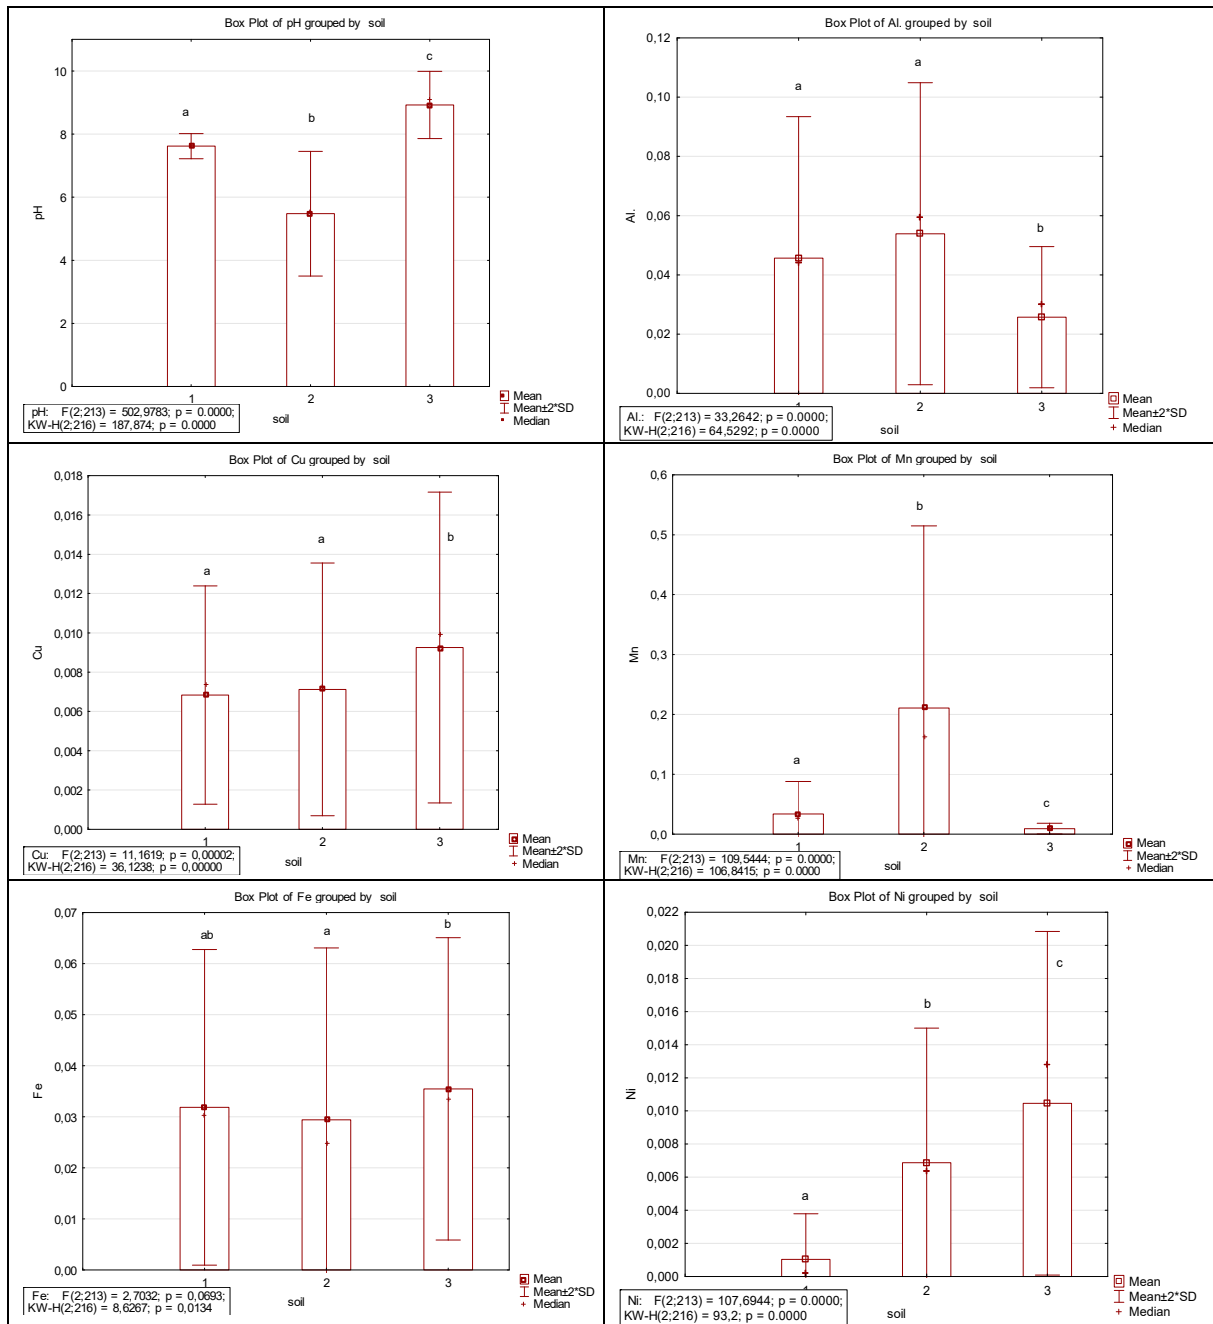

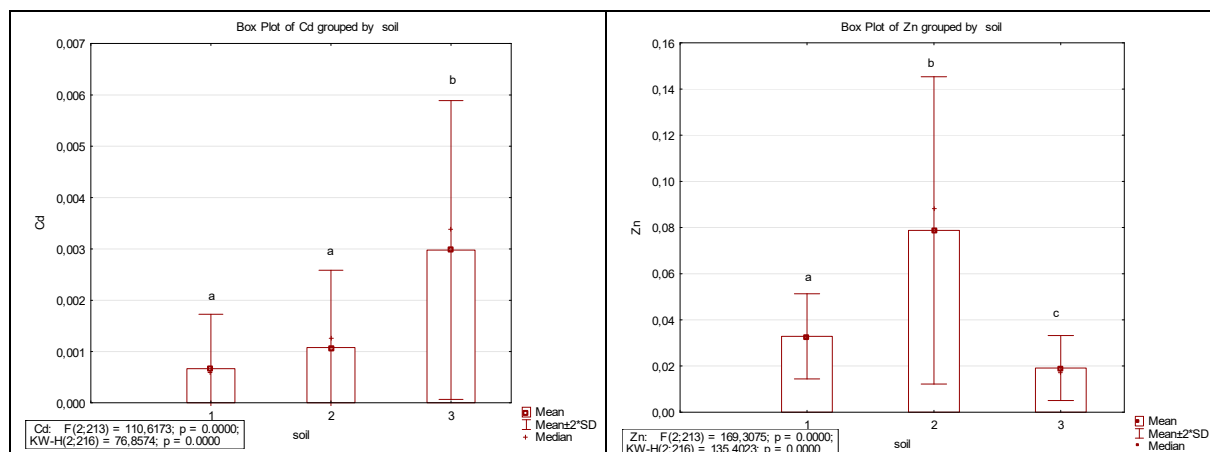

**Figure S1** Metal concentration depending on water pH 1- neutral, 2 - acidic, 3 – alkaline

a, b, c – values marked with different letters differ significantly

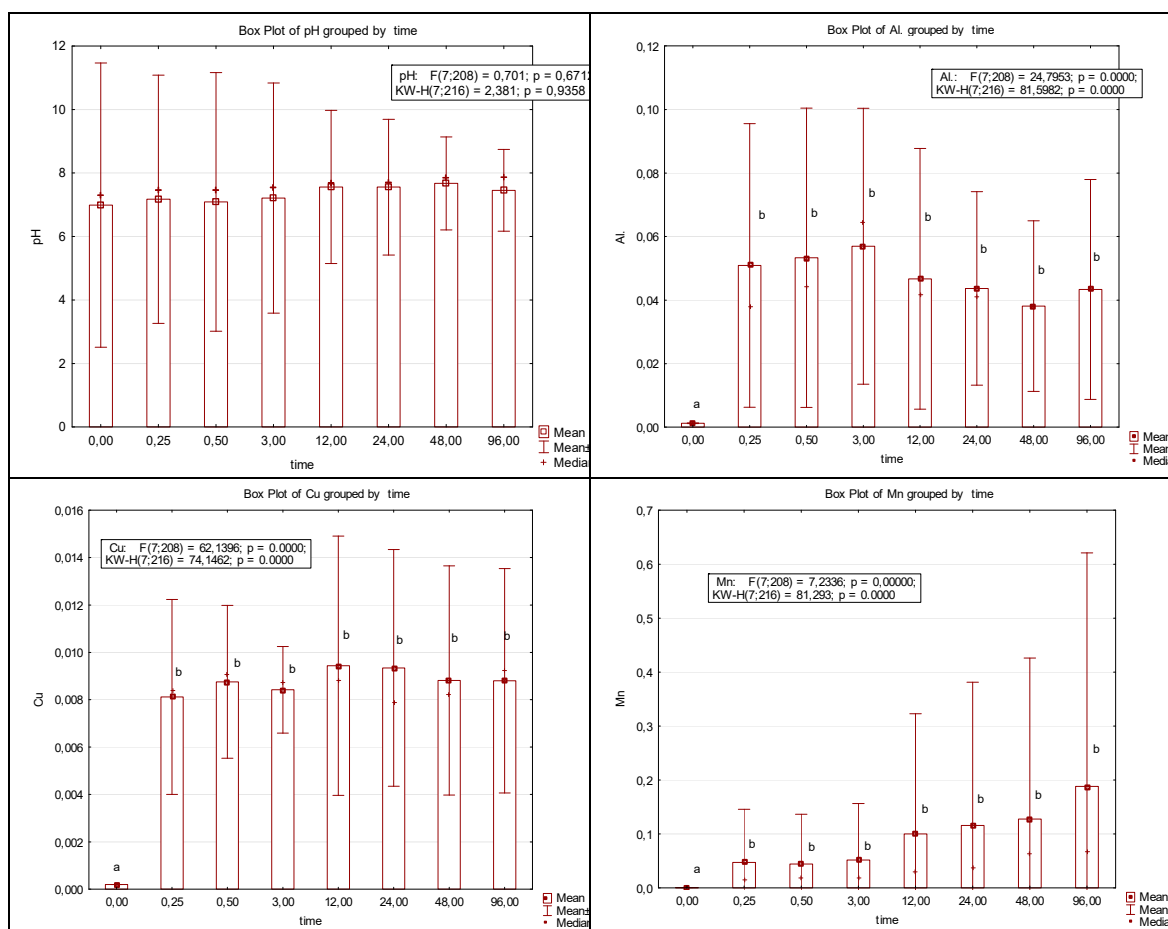

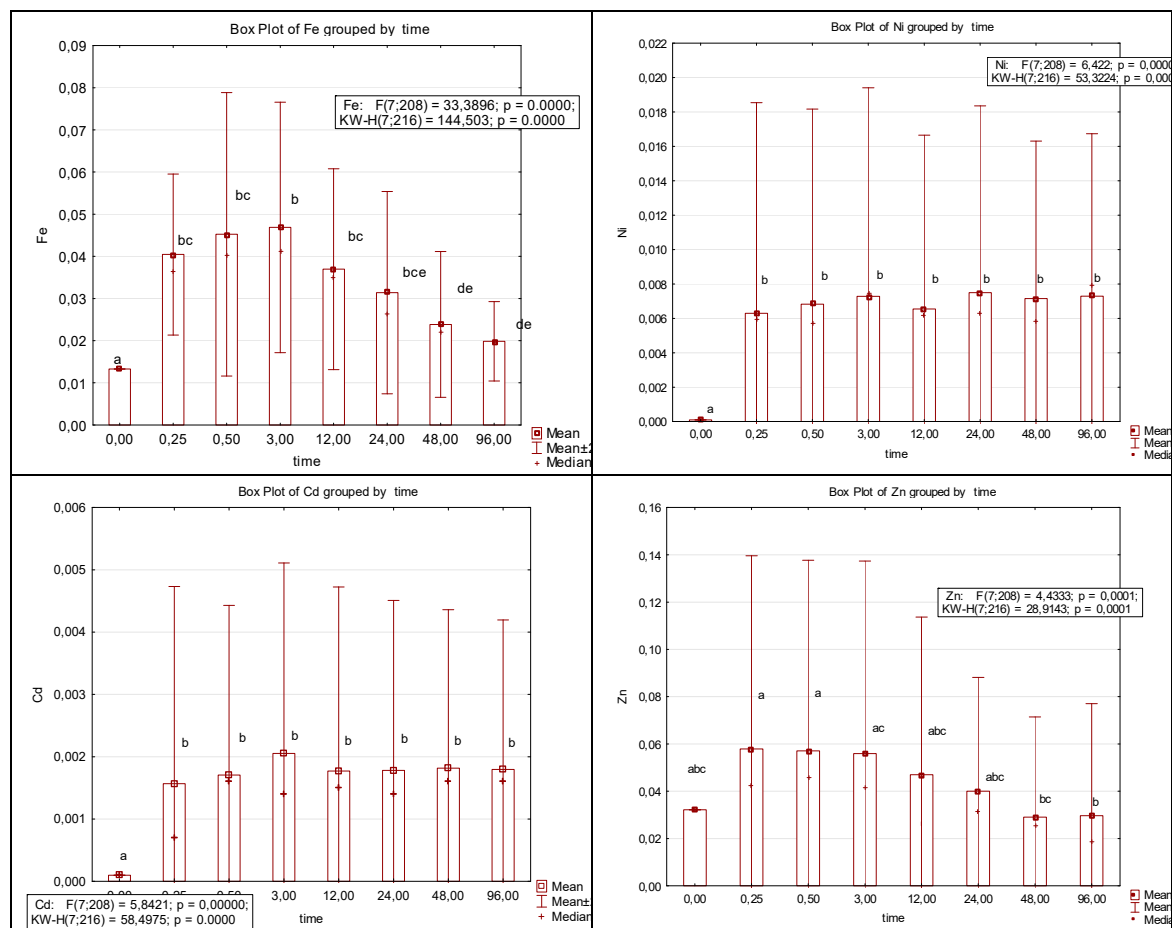

**Figure S2** Metal content depending on the time elapsed since the start of the experiment (mean for all environments)

a, b, c – values marked with different letters differ significantly
